# Supplementary material for: Identification, screening and molecular mechanisms of natural stable angiotensin-converting enzyme (ACE) inhibitory peptides from foxtail millet protein hydrolysates: a combined in silico and in vitro study
Source: Royal Society of Chemistry journal article supplement (doi:10.1039/d4fo01992j), 2024-01-01
Supplement: d4fo01992j1.pdf [file d4fo01992j1.pdf]

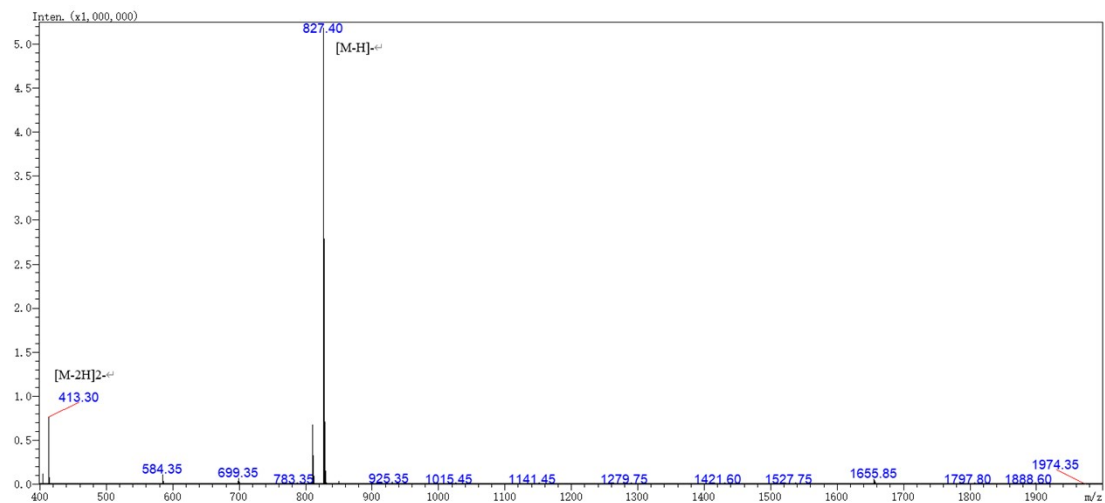

(A) QDPLFPL

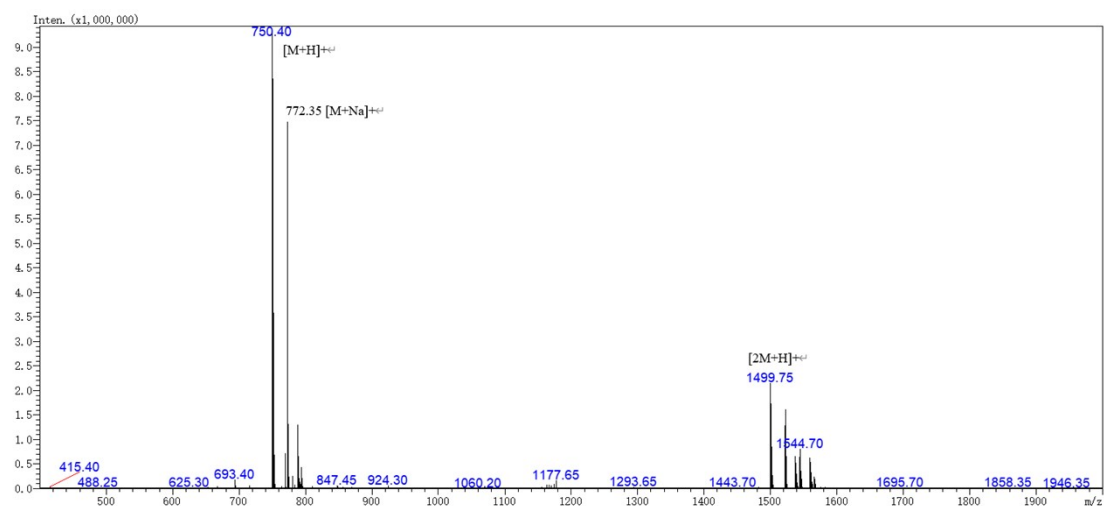

(B) FPGVSPF

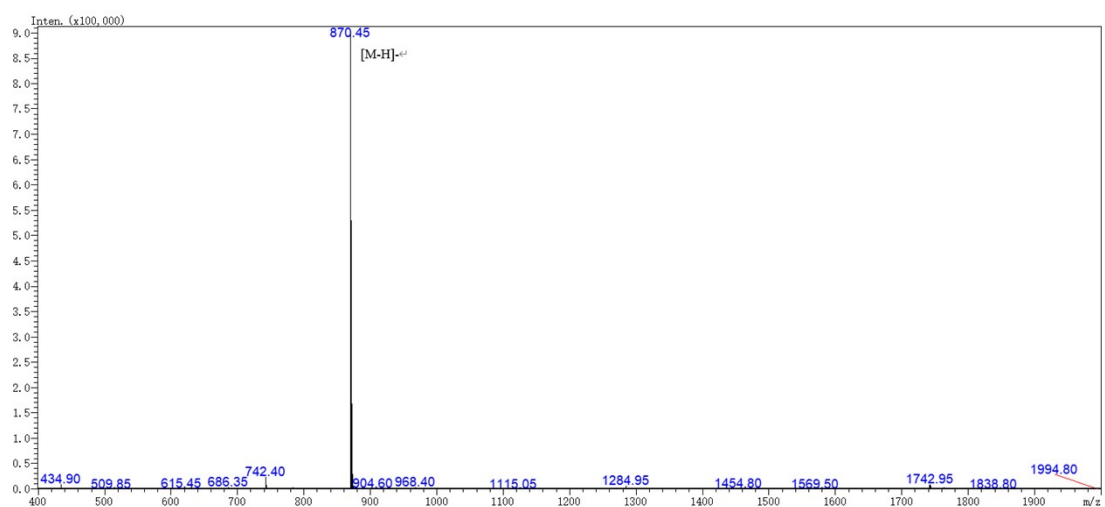

(C) SPAQLLPF

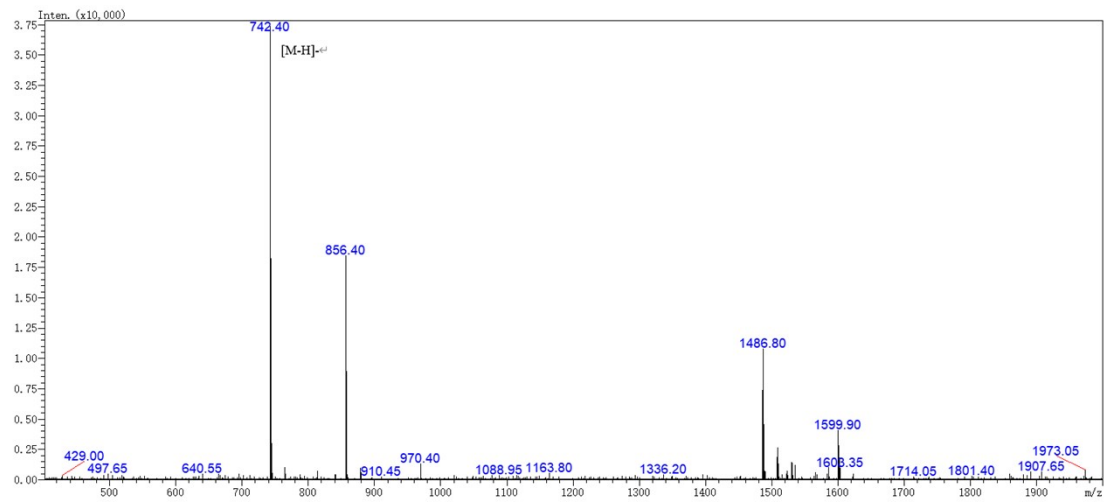

(D) LVPYRP

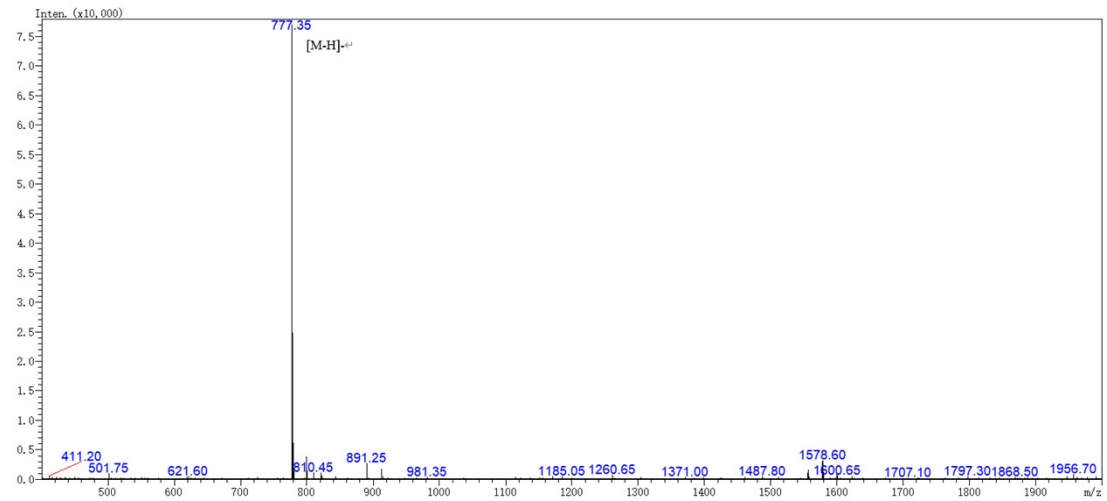

(E) WYWPQ

Figure S1 Mass spectra of QDPLFPL (A), FPGVSPF (B), SPAQLLPF (C), LVPYRP (D) and WYWPQ (E) characterized by LC-MS/MS.

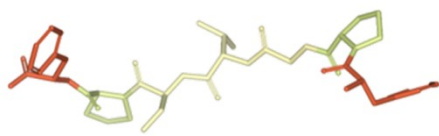

FPGVSPF

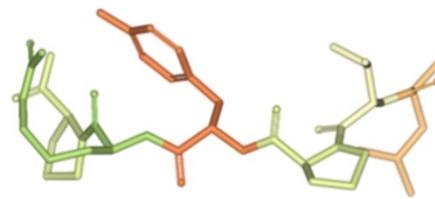

LVPYRP

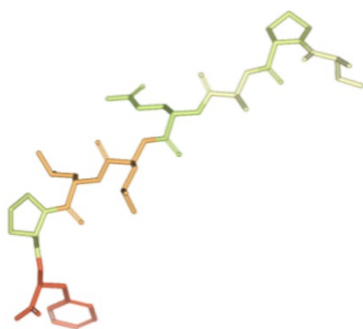

SPAQLLPF

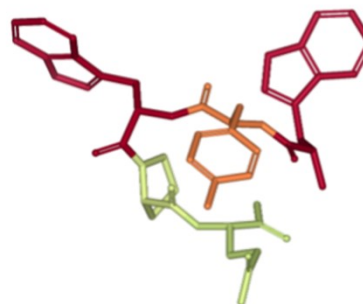

WYWPQ

Figure S2 Structure of four ACE inhibitory peptides prepared by PyMOL software.

Table S1 ACE residues in coordination with Zn<sup>2+</sup> and in the S<sub>1</sub>, S<sub>1</sub>' and S<sub>2</sub> pockets interacting with LVPYRP and WYWPQ.

| ACE region              | ACE key residue | LVPYRP | WYWPQ |
|-------------------------|-----------------|--------|-------|
| Zinc ligand             | His383          | √      | -     |
|                         | His387          | √      | -     |
|                         | Glu411          | √      | √     |
| S <sub>1</sub> pocket   | Ala354          | √      | -     |
|                         | Glu384          | √      | -     |
|                         | Tyr523          | √      | -     |
| S <sub>1</sub> ' pocket | Glu162          | √      | -     |
| S <sub>2</sub> pocket   | Gln281          | √      | -     |
|                         | His353          | √      | -     |
|                         | Lys511          | -      | -     |
|                         | His513          | √      | -     |
|                         | Tyr520          | √      | -     |
